# Supplementary material
Source: publisher figshare collection journal article supplement (https://frontiersin.figshare.com/ndownloader/files/34304870)
Supplement: Supplementary file [file 34304870]

Survival Analysis: Age

2021年8月24日 16:44:28  
lenovo

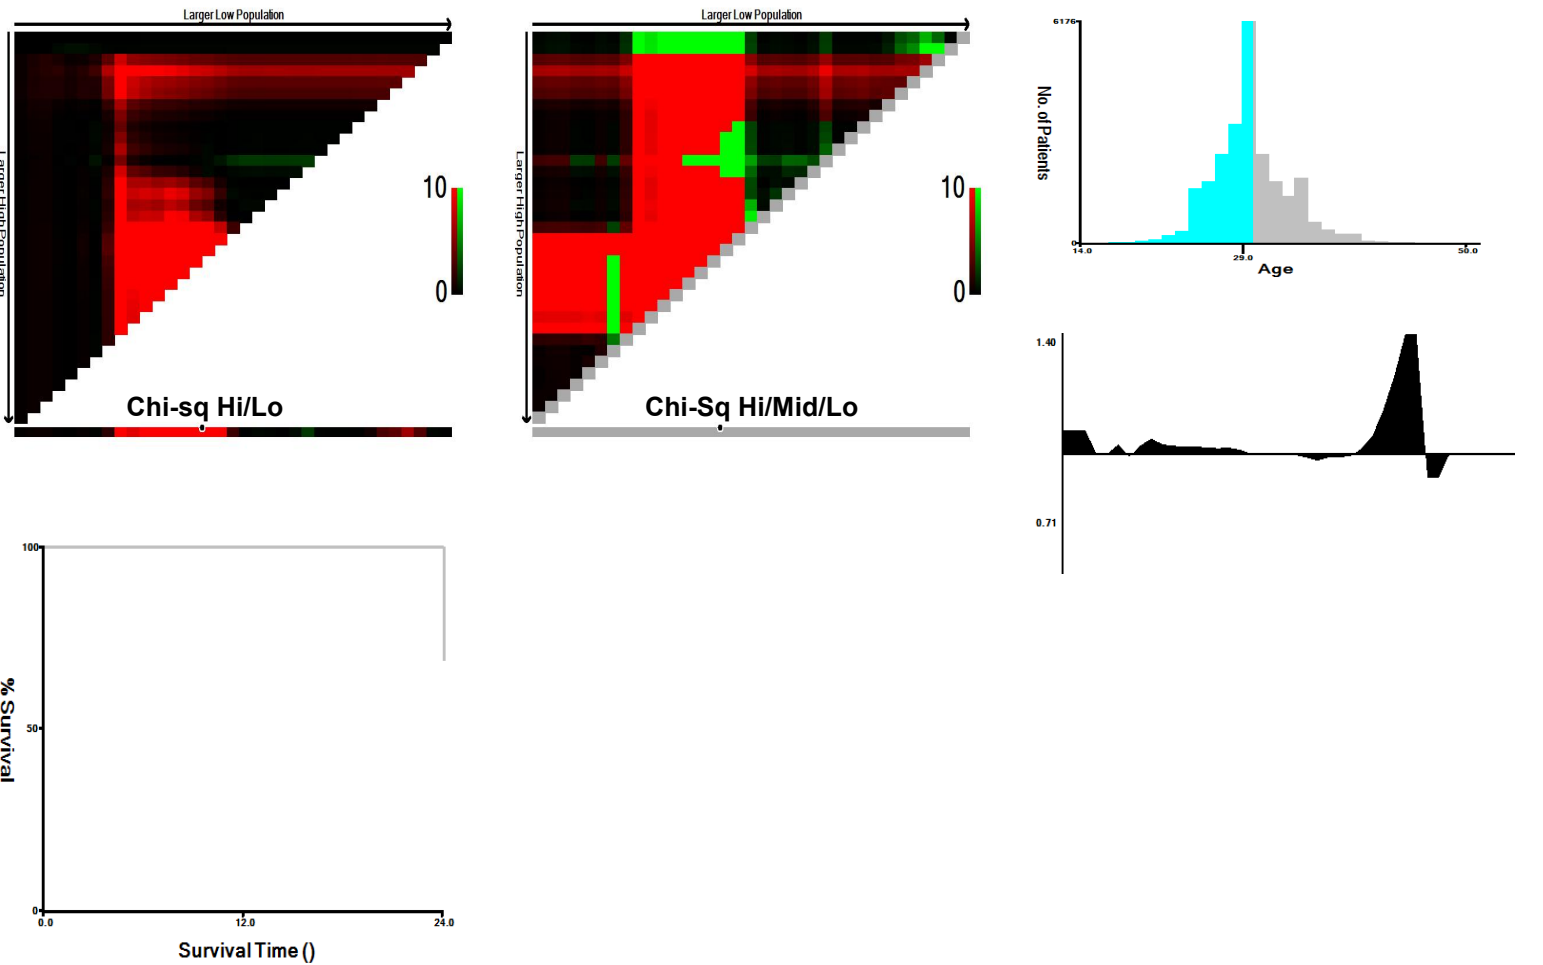

Subpopulation Cutpoints:

| Pt No | % Total | Events | Rate | Rank     | Range            |
|-------|---------|--------|------|----------|------------------|
| 13045 | 52.53   | 747    | 5.73 | 0 to 15  | 14.00 thru 29.00 |
| 11788 | 47.47   | 876    | 7.43 | 16 to 35 | 30.00 thru 50.00 |
| 24833 | 100.00  | 1623   | 6.54 | 0 to 35  | 14.00 thru 50.00 |

Statistics:

| Variable             | Value       |              |
|----------------------|-------------|--------------|
| Miller-Seigmund P    | <0.0001     | Max: <0.0001 |
| Chi-sq Hi/Lo         | 51.2588     | Max: 51.2588 |
| Relative Risk 1 vs 2 | 1.00 / 1.30 |              |
